# Supplementary material
Source: PubMed Central journal article supplement (PMC3408839)
Supplement: NIHMS386386-supplement-1.pdf [file NIHMS386386-supplement-1.pdf]

## **The Blk pathway functions as a tumor suppressor in chronic myeloid leukemia stem cells**

Haojian Zhang<sup>1</sup>, Cong Peng<sup>1</sup>, Yiguo Hu<sup>2</sup>, Huawei Li<sup>1</sup>, Zhi Sheng<sup>3</sup>, Yaoyu Chen<sup>1</sup>, Con Sullivan<sup>4</sup>, Jan Cerny<sup>1</sup>, Lloyd Hutchinson<sup>5</sup>, Anne Higgins<sup>5</sup>, Patricia Miron<sup>5</sup>, Xueqing Zhang<sup>6</sup>, Michael Brehm<sup>7</sup>, Dongguang Li<sup>8</sup>, Michael R. Green<sup>3,9</sup>, Shaoguang Li<sup>1</sup> \*

<sup>1</sup>Division of Hematology/Oncology, Department of Medicine, University of Massachusetts Medical School, 364 Plantation Street, Worcester, MA 01605, USA

<sup>2</sup>Dana-Farber Cancer Institute, Harvard Medical School, 44 Binney Street, Mayer 557, Boston, MA 02115, USA

<sup>3</sup>Programs in Gene Function and Expression and Molecular Medicine, University of Massachusetts Medical School, Worcester, MA 01605, USA

<sup>4</sup>Department of Molecular and Biomedical Sciences, University of Maine, 5735 Hitchner Hall, Orono, ME 04469, USA

<sup>5</sup>Molecular Diagnostic Oncology, Department of Pathology, Division of Anatomic Pathology, University of Massachusetts Memorial Medical Center, One Innovation Drive, Worcester, MA 01655, USA

<sup>6</sup>Department of Pediatrics, University of Massachusetts Medical School, Worcester, MA 01605, USA

<sup>7</sup> Department of Molecular Medicine, University of Massachusetts Medical School, Worcester, MA 01605, USA

<sup>8</sup>School of Computer and Information Science, Edith Cowan University, 2 Bradford Street, Mount Lawley, WA 6050, Australia

<sup>9</sup>Howard Hughes Medical Institute

\*Correspondence should be addressed to S.L. ([Shaoguang.Li@umassmed.edu](mailto:Shaoguang.Li@umassmed.edu)).

## **CONTENTS:**

Supplementary Figure 1

Supplementary Figure 2

Supplementary Figure 3

Supplementary Figure 4

Supplementary Figure 5

Supplementary Figure 6

Supplementary Figure 7

Supplementary Figure 8

Supplementary Figure 9

Supplementary Figure 10

Supplementary Figure 11

Supplementary Table 1

Supplementary Table 2

Supplementary Table 3

Supplementary Note

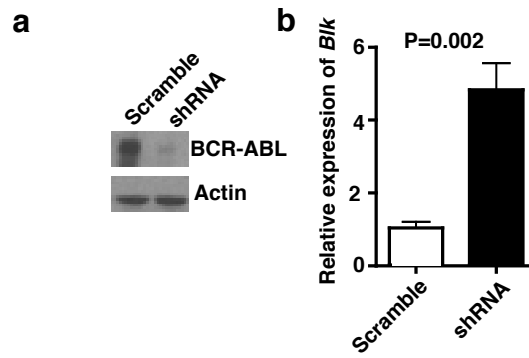

**Supplementary Figure 1 Knockdown of BCR-ABL expression restores *Blk* expression.** (a) Western blot analysis showed marked decrease of BCR-ABL expression after lentivirus shRNA infection. (b) Real time RT-PCR analysis showed increased *Blk* expression in leukemia cells after knockdown of BCR-ABL.

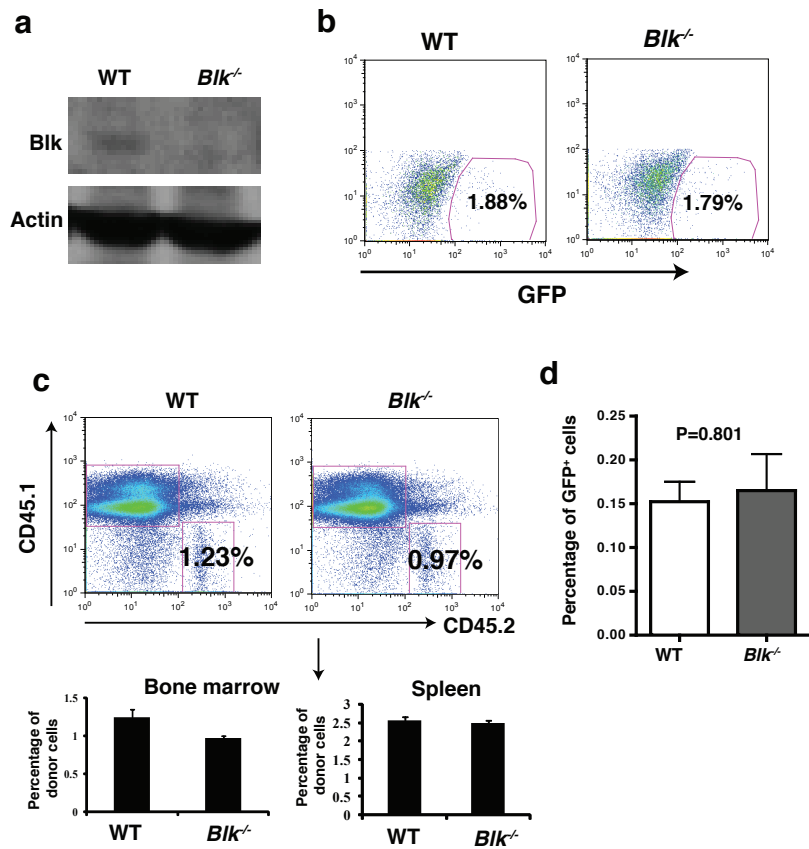

**Supplementary Figure 2 Blk deletion does not affect the transfection efficiency and homing ability.** (a) Detection of Blk expression in bone marrow cells of WT and *Blk*<sup>-/-</sup> mice by western blotting. (b) Blk does not affect the retroviral transduction efficiency of bone marrow cells. Bone marrow cells from 5-FU treated WT or *Blk*<sup>-/-</sup> mice were transduced with *BCR-ABL-GFP*, and the percentages of GFP<sup>+</sup> cells before BMT were analyzed by FACS. (c) Homing assay of WT or *Blk*<sup>-/-</sup> bone marrow cells. 6 × 10<sup>6</sup> WT or *Blk*<sup>-/-</sup> bone marrow cells (CD45.2) were transplanted into lethally irradiated recipients (CD45.1) and the donor-derived bone marrow cells (CD45.2) were detected by FACS in 3 hours after BMT. Mean values (± s.e.m.) are shown. (d) WT or *Blk*<sup>-/-</sup> bone marrow cells transduced with *BCR-ABL* retrovirus were cultured for 6 days. Equal number of GFP<sup>+</sup> cells were transplanted into each lethally irradiated recipient mice, and the percentages of GFP<sup>+</sup> cells in bone marrow of recipients were analyzed 3 hours after BMT (n=4). Mean values (± s.e.m.) are shown.

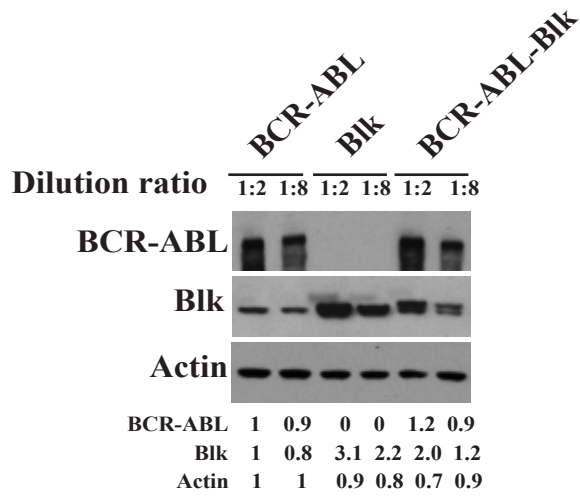

**Supplementary Figure 3 Functional testing of *BCR-ABL* and *Blk* retroviruses in 3T3 cells.** 3T3 cells were transduced with retrovirus (1:2 or 1:8 dilution) expressing *BCR-ABL-GFP*, *Blk-GFP*, or *BCR-ABL-Blk*. Expression of BCR-ABL and Blk proteins were detected by western blotting.

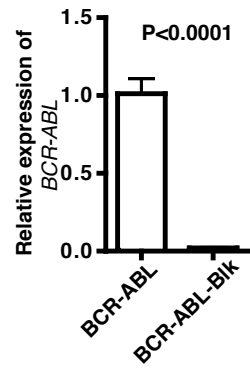

**Supplementary Figure 4 Detection of *BCR-ABL* expression.** RT-PCR analysis of *BCR-ABL* expression in peripheral blood of BCR-ABL or BCR-ABL-Bik induced CML mice treated with imatinib. Mean values ( $\pm$  s.e.m.) are shown

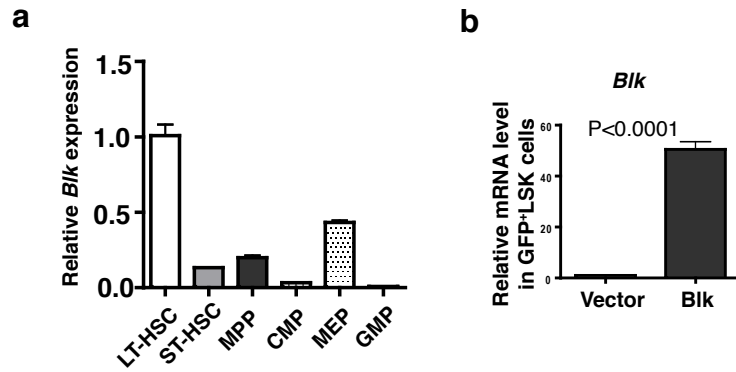

**Supplementary Figure 5 Real time RT-PCR analysis of *Blk* expression** (a) *Blk* expression in sorted LT-HSC, ST-HSC, MPP, CMP, MEP, and GMP population. (b) *Blk* expression in sorted GFP<sup>+</sup>LSK cells from recipients of *GFP* or *Blk-GFP* transduced bone marrow cells. Mean values ( $\pm$  s.e.m.) are shown.

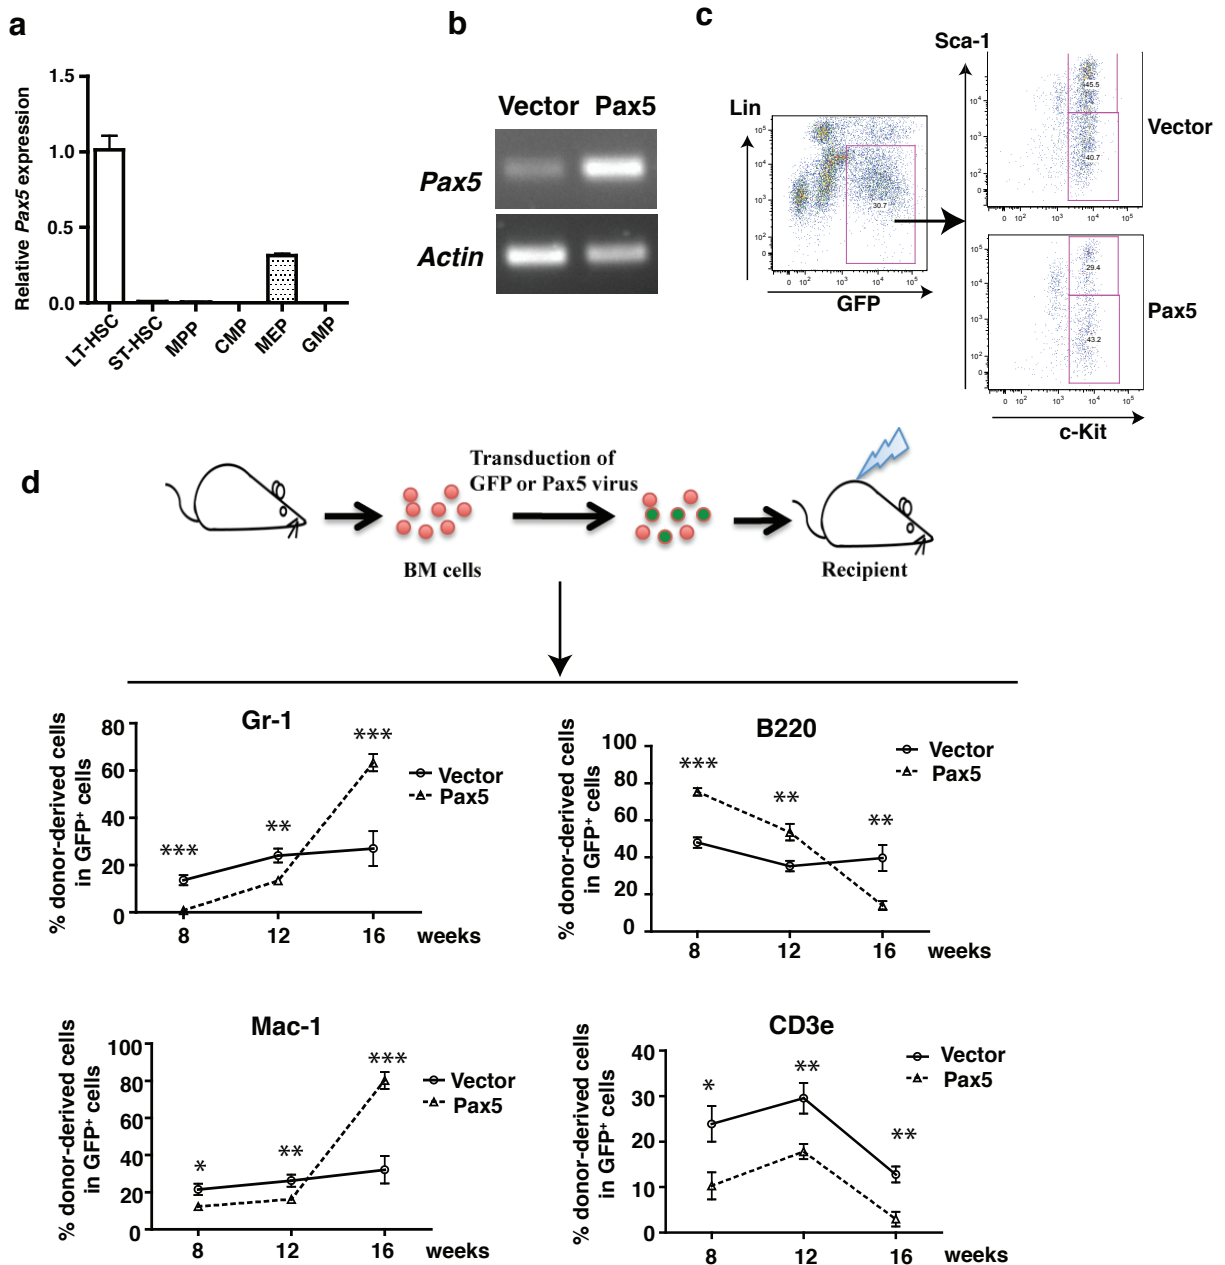

**Supplementary Figure 6 The role of Pax5 in normal hematopoiesis. (a)** Real time RT-PCR analysis of *Pax5* expression in different stem/progenitor cell populations. **(b)** Real time RT-PCR analysis showed *Pax5* expression in sorted LSK cells transduced with *Pax5-GFP* retrovirus. **(c)** Bone marrow cells were transduced with retrovirus expressing *Pax5-GFP* or *GFP* alone, and cultured for 4 days in vitro under the stem cell culture conditions. FACS analysis showed a lower percentage of LSK cells in Pax5-expressing bone marrow cells than in non-Pax5-expressing bone marrow cells. **(d)** Long-term reconstitution assay of Pax5-GFP or GFP-expressing HSC. Bone marrow cells were transduced with *Pax5-GFP* or *GFP* virus, and injected into lethally irradiated mice. The distribution of different lineages was analyzed by FACS at 8, 12, and 16 weeks after BMT. \* $p < 0.05$ ; \*\* $p < 0.01$ ; \*\*\* $p < 0.001$ .





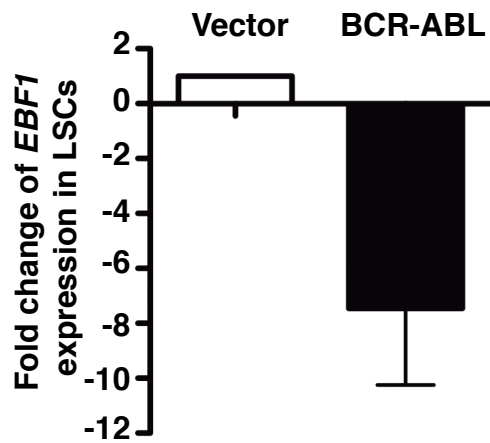

**Supplementary Figure 8** *EBF1* expression was down-regulated in BCR-ABL expressing LSCs. Microarray analysis showing *EBF1* expression in vector- and *BCR-ABL*-transduced LSCs. Mean values ( $\pm$  s.e.m) are shown.  $p < 0.05$ .

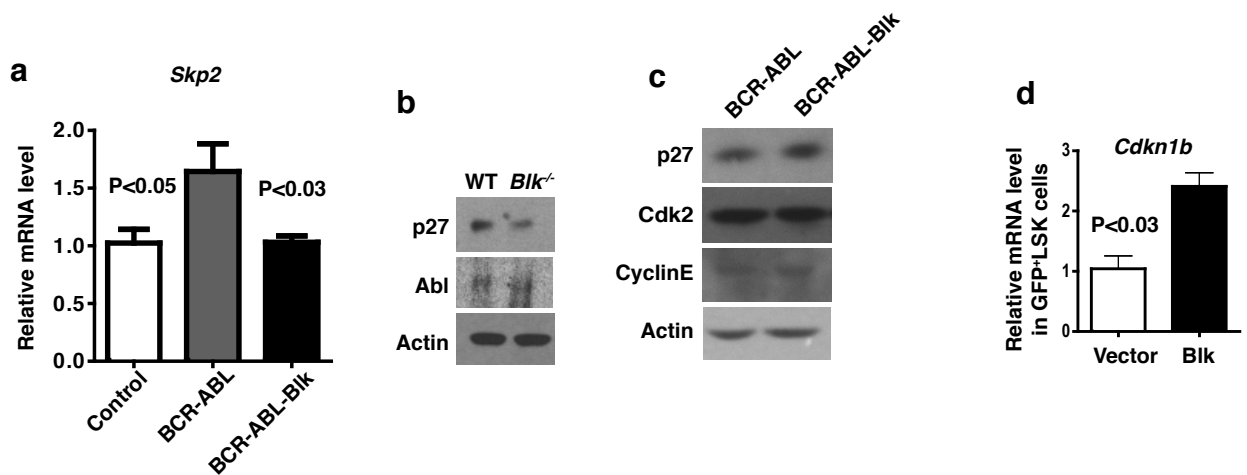

**Supplementary Figure 9 Blk regulates the expression of Skp2 and p27. (a)**

Real time RT-PCR analysis showed Blk inhibited the induction of *Skp2* expression by BCR-ABL. (b) p27 was downregulated in myeloid leukemia cells. Myeloid leukemia cells were sorted from the spleen of CML mice receiving BCR-ABL transduced WT or *Blk*<sup>-/-</sup> bone marrow cells two weeks after CML induction, and p27 levels in the cells were detected by western blot. (c) Western blot analysis showed that Blk induced expression of p27 expression but not CDK2 and cyclin E in bone marrow cells from CML mice which were cultured for 4 days in vitro under the stem cell culture conditions. (d) Real-time RT-PCR data showed a significant upregulation of *Cdkn1b* in sorted Blk-expressing LSK cells. Mean values ( $\pm$  s.e.m.) were shown (P<0.01).

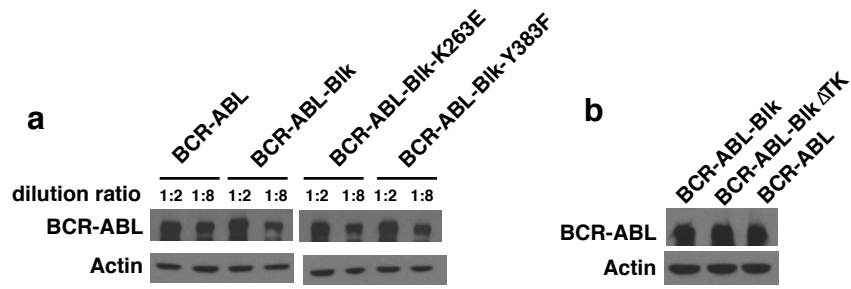

**Supplementary Figure 10 Normalization of the retrovirus titers of *BCR-ABL*, *BCR-ABL-Bik*, *BCR-ABL-Bik-K263E*, *BCR-ABL-Bik-Y383F*, and *BCR-ABL-Bik $\Delta$ TK*. (a and b) NIH3T3 cells were infected with retroviruses, and 48h later, the levels of BCR-ABL proteins were analyzed by western blotting.**

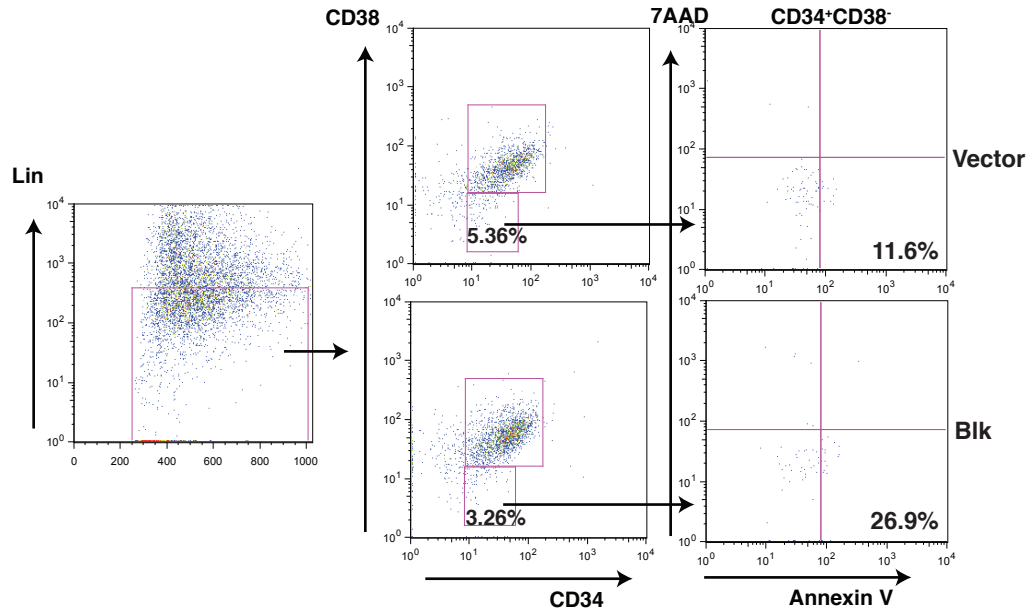

**Supplementary Figure 11 Blk expression induces apoptosis of CML stem cells.** Lin<sup>-</sup>CD34<sup>+</sup> cells were sorted and infected with *Blk* lentivirus. After puromycin selection, FACS analysis showed increased apoptosis in the presence of Blk.

**Supplementary Table 1. Long-term repopulation potential of control and Blk-expressing LSK cells**

| Number of LSK cells | Control                                   | Blk |
|---------------------|-------------------------------------------|-----|
|                     | Positive for donor engraftment/Total mice |     |
| 10                  | 0/6                                       | 0/6 |
| 50                  | 3/7                                       | 3/7 |
| 100                 | 4/6                                       | 3/6 |
| 500                 | 6/6                                       | 6/6 |

**Supplementary Table 2. Lists of genes regulated by Blk in leukemia stem cells****List of upregulated genes ( $P \leq 0.05$ )**

| <i>Symbol</i>    | Gene name                                                   | Relative fold change |
|------------------|-------------------------------------------------------------|----------------------|
| <i>Igkv19-93</i> | immunoglobulin kappa chain variable 19-93                   | 2.89                 |
| <i>Myo1h</i>     | myosin 1H                                                   | 2.1                  |
| <i>Ufsp1</i>     | UFM1-specific peptidase 1                                   | 2.07                 |
| <i>Them4</i>     | thioesterase superfamily member 4                           | 1.92                 |
| <i>Igl-V2</i>    | immunoglobulin lambda chain, variable 2                     | 1.89                 |
| <i>Clec9a</i>    | C-type lectin domain family 9, member a                     | 1.88                 |
| <i>Cldn22</i>    | claudin 22                                                  | 1.78                 |
| <i>Rab1b</i>     | RAB1B, member RAS oncogene family                           | 1.78                 |
| <i>Gnrh1</i>     | gonadotropin releasing hormone 1                            | 1.77                 |
| <i>Tsga14</i>    | testis specific gene A14                                    | 1.75                 |
| <i>Plekho2</i>   | pleckstrin homology domain containing, family O member 2    | 1.73                 |
| <i>Hist1h2ak</i> | histone cluster 1, H2ak                                     | 1.73                 |
| <i>Cyb5d1</i>    | cytochrome b5 domain containing 1                           | 1.72                 |
| <i>Prl7c1</i>    | prolactin family 7, subfamily c, member 1                   | 1.7                  |
| <i>Zfp459</i>    | zinc finger protein 459                                     | 1.66                 |
| <i>Kcnrg</i>     | potassium channel regulator                                 | 1.65                 |
| <i>Cmtm3</i>     | CKLF-like MARVEL transmembrane domain containing 3          | 1.65                 |
| <i>Gcet2</i>     | germinal center expressed transcript 2                      | 1.62                 |
| <i>Olf43</i>     | olfactory receptor 43                                       | 1.62                 |
| <i>Rfc5</i>      | replication factor C (activator 1) 5                        | 1.6                  |
| <i>Tek</i>       | endothelial-specific receptor tyrosine kinase               | 1.59                 |
| <i>Lrrc28</i>    | leucine rich repeat containing 28                           | 1.59                 |
| <i>Slc41a1</i>   | solute carrier family 41, member 1                          | 1.59                 |
| <i>Mxd4</i>      | Max dimerization protein 4                                  | 1.59                 |
| <i>Bclp2</i>     | chitinase like protein 2                                    | 1.59                 |
| <i>Serpinb9</i>  | serine (or cysteine) peptidase inhibitor, clade B, member 9 | 1.59                 |
| <i>Hist2h2ab</i> | histone cluster 2, H2ab                                     | 1.58                 |
| <i>Ppt2</i>      | palmitoyl-protein thioesterase 2                            | 1.58                 |
| <i>Mylc2pl</i>   | myosin light chain 2, precursor lymphocyte-specific         | 1.58                 |
| <i>Nlrp1a</i>    | NLR family, pyrin domain containing 1A                      | 1.57                 |
| <i>Dppa3</i>     | developmental pluripotency-associated 3                     | 1.57                 |
| <i>Cypt6</i>     | cysteine-rich perinuclear theca 6                           | 1.57                 |
| <i>Zfp313</i>    | zinc finger protein 313                                     | 1.55                 |
| <i>Zfp7</i>      | zinc finger protein 7                                       | 1.54                 |
| <i>Tut1</i>      | terminal uridylyl transferase 1, U6 snRNA-specific          | 1.54                 |
| <i>Eif4h</i>     | eukaryotic translation initiation factor 4H                 | 1.54                 |

|                |                                                                                                                        |      |
|----------------|------------------------------------------------------------------------------------------------------------------------|------|
| <i>Defb5</i>   | defensin beta 5                                                                                                        | 1.54 |
| <i>Stk40</i>   | serine/threonine kinase 40                                                                                             | 1.53 |
| <i>Mpzl1</i>   | myelin protein zero-like 1                                                                                             | 1.52 |
| <i>Nfya</i>    | nuclear transcription factor-Y alpha                                                                                   | 1.5  |
| <i>Tmem110</i> | transmembrane protein 110                                                                                              | 1.5  |
| <i>Olf1517</i> | olfactory receptor 517                                                                                                 | 1.5  |
| <i>Zfat</i>    | zinc finger and AT hook domain containing<br>COP9 (constitutive photomorphogenic) homolog, subunit 8                   | 1.49 |
| <i>Cops8</i>   | ( <i>Arabidopsis thaliana</i> )                                                                                        | 1.49 |
| <i>Selm</i>    | selenoprotein M                                                                                                        | 1.49 |
| <i>Lman2l</i>  | lectin, mannose-binding 2-like                                                                                         | 1.48 |
| <i>Zfyve16</i> | zinc finger, FYVE domain containing 16                                                                                 | 1.48 |
| <i>Srl</i>     | Sarcalumenin                                                                                                           | 1.47 |
| <i>Ube2m</i>   | ubiquitin-conjugating enzyme E2M (UBC12 homolog, yeast)                                                                | 1.47 |
| <i>Cldn12</i>  | claudin 12                                                                                                             | 1.46 |
| <i>Lrig2</i>   | leucine-rich repeats and immunoglobulin-like domains 2                                                                 | 1.46 |
| <i>Olf1128</i> | olfactory receptor 1128                                                                                                | 1.45 |
| <i>Enpep</i>   | glutamyl aminopeptidase                                                                                                | 1.45 |
| <i>Sbf1</i>    | SET binding factor 1                                                                                                   | 1.45 |
| <i>Wdr22</i>   | WD repeat domain 22                                                                                                    | 1.45 |
| <i>Il15</i>    | interleukin 15                                                                                                         | 1.45 |
| <i>Map4k2</i>  | mitogen-activated protein kinase kinase kinase kinase 2                                                                | 1.44 |
| <i>Il17ra</i>  | interleukin 17 receptor A                                                                                              | 1.44 |
| <i>Efcab4b</i> | EF-hand calcium binding domain 4B                                                                                      | 1.43 |
| <i>Csnk1g1</i> | casein kinase 1, gamma 1                                                                                               | 1.43 |
| <i>Sh2d3c</i>  | SH2 domain containing 3C                                                                                               | 1.43 |
| <i>Nfic</i>    | nuclear factor I/C                                                                                                     | 1.42 |
| <i>Kctd9</i>   | potassium channel tetramerisation domain containing 9<br>nuclear factor of kappa light polypeptide gene enhancer in B- | 1.42 |
| <i>Nfkbiz</i>  | cells inhibitor, zeta                                                                                                  | 1.42 |
| <i>Mknk2</i>   | MAP kinase-interacting serine/threonine kinase 2                                                                       | 1.42 |
| <i>Rdh13</i>   | retinol dehydrogenase 13 (all-trans and 9-cis)                                                                         | 1.41 |
| <i>Olf1045</i> | olfactory receptor 1045                                                                                                | 1.41 |
| <i>Blk</i>     | B lymphoid kinase                                                                                                      | 1.41 |
| <i>Zfp354c</i> | zinc finger protein 354C                                                                                               | 1.4  |
| <i>Grlf1</i>   | glucocorticoid receptor DNA binding factor 1                                                                           | 1.4  |
| <i>Mettl1</i>  | methyltransferase-like 1                                                                                               | 1.4  |
| <i>Asf1b</i>   | ASF1 anti-silencing function 1 homolog B ( <i>S. cerevisiae</i> )                                                      | 1.4  |
| <i>Tnf</i>     | tumor necrosis factor                                                                                                  | 1.4  |
| <i>Zbtb24</i>  | zinc finger and BTB domain containing 24                                                                               | 1.4  |



|                  |                                                                |      |
|------------------|----------------------------------------------------------------|------|
| <i>Gfi1b</i>     | growth factor independent 1B                                   | 1.39 |
| <i>Saps1</i>     | SAPS domain family, member 1                                   | 1.38 |
| <i>Rftn1</i>     | raftlin lipid raft linker 1                                    | 1.38 |
| <i>Cacnb4</i>    | calcium channel, voltage-dependent, beta 4 subunit             | 1.37 |
| <i>Abca1</i>     | ATP-binding cassette, sub-family A (ABC1), member 1            | 1.37 |
| <i>Gtsf1</i>     | gametocyte specific factor 1                                   | 1.37 |
| <i>Krt85</i>     | keratin 85                                                     | 1.37 |
|                  | ubiquinol-cytochrome c reductase complex chaperone, CBP3       |      |
| <i>Uqcc</i>      | homolog (yeast)                                                | 1.36 |
| <i>Gm266</i>     | gene model 266, (NCBI)                                         | 1.36 |
| <i>Slc27a1</i>   | solute carrier family 27 (fatty acid transporter), member 1    | 1.36 |
| <i>Ccnt2</i>     | cyclin T2                                                      | 1.36 |
| <i>Ccdc21</i>    | coiled-coil domain containing 21                               | 1.36 |
|                  | gamma-aminobutyric acid (GABA(A)) receptor-associated          |      |
| <i>Gabarapl1</i> | protein-like 1                                                 | 1.36 |
| <i>Slc12a6</i>   | solute carrier family 12, member 6                             | 1.36 |
| <i>Ccdc52</i>    | coiled-coil domain containing 52                               | 1.36 |
| <i>Nlgn2</i>     | neuroligin 2                                                   | 1.36 |
| <i>Fahd2a</i>    | fumarylacetoacetate hydrolase domain containing 2A             | 1.36 |
| <i>Hmbs</i>      | hydroxymethylbilane synthase                                   | 1.35 |
| <i>Rnf122</i>    | ring finger protein 122                                        | 1.35 |
| <i>Gmeb1</i>     | glucocorticoid modulatory element binding protein 1            | 1.35 |
| <i>Usp49</i>     | ubiquitin specific peptidase 49                                | 1.35 |
| <i>Arhgef5</i>   | Rho guanine nucleotide exchange factor (GEF) 5                 | 1.35 |
| <i>Xkr5</i>      | X Kell blood group precursor-related family, member 5          | 1.35 |
| <i>Sh3bp1</i>    | Sh3kbp1 binding protein 1                                      | 1.34 |
| <i>Nbr1</i>      | neighbor of Brca1 gene 1                                       | 1.34 |
| <i>Cdkn2c</i>    | cyclin-dependent kinase inhibitor 2C (p18, inhibits CDK4)      | 1.34 |
| <i>Parp14</i>    | poly (ADP-ribose) polymerase family, member 14                 | 1.34 |
| <i>Hist1h1b</i>  | histone cluster 1, H1b                                         | 1.34 |
| <i>Svil</i>      | supervillin                                                    | 1.34 |
| <i>Rogdi</i>     | rogdi homolog (Drosophila)                                     | 1.34 |
| <i>Syap1</i>     | synapse associated protein 1                                   | 1.34 |
| <i>Zfp276</i>    | zinc finger protein (C2H2 type) 276                            | 1.34 |
|                  | nuclear factor of activated T-cells, cytoplasmic, calcineurin- |      |
| <i>Nfatc1</i>    | dependent 1                                                    | 1.33 |
| <i>Cdkn1b</i>    | cyclin-dependent kinase inhibitor 1B                           | 1.33 |
| <i>Gdf6</i>      | growth differentiation factor 6                                | 1.33 |
| <i>Prkacb</i>    | protein kinase, cAMP dependent, catalytic, beta                | 1.33 |
| <i>Nek7</i>      | NIMA (never in mitosis gene a)-related expressed kinase 7      | 1.33 |

|                |                                                                  |      |
|----------------|------------------------------------------------------------------|------|
| <i>Tmem35</i>  | transmembrane protein 35                                         | 1.32 |
| <i>Gk5</i>     | glycerol kinase 5 (putative)                                     | 1.32 |
| <i>Gtf2e1</i>  | general transcription factor II E, polypeptide 1 (alpha subunit) | 1.32 |
| <i>Hrrnr</i>   | hornerin                                                         | 1.32 |
| <i>Apol10a</i> | apolipoprotein L 10a                                             | 1.32 |
| <i>Tnrc6c</i>  | trinucleotide repeat containing 6C                               | 1.31 |
| <i>Prkcsk</i>  | protein kinase C substrate 80K-H                                 | 1.31 |
| <i>Ppard</i>   | peroxisome proliferator activator receptor delta                 | 1.3  |
| <i>Zbtb3</i>   | zinc finger and BTB domain containing 3                          | 1.3  |
| <i>Inpp4a</i>  | inositol polyphosphate-4-phosphatase, type I                     | 1.3  |

### List of downregulated genes ( $P \leq 0.05$ )

| Symbol           | Gene name                                                    | Relative fold change |
|------------------|--------------------------------------------------------------|----------------------|
| <i>Khdc1a</i>    | KH homology domain containing 1A                             | 4.40                 |
| <i>Il1f9</i>     | interleukin 1 family, member 9                               | 2.78                 |
| <i>Ublcp1</i>    | ubiquitin-like domain containing CTD phosphatase 1           | 2.48                 |
| <i>Lcn2</i>      | lipocalin 2                                                  | 2.39                 |
| <i>Scrn3</i>     | secernin 3                                                   | 2.26                 |
| <i>Fabp4</i>     | fatty acid binding protein 4, adipocyte                      | 2.21                 |
| <i>Trem3</i>     | triggering receptor expressed on myeloid cells 3             | 2.17                 |
| <i>Chi3l3</i>    | chitinase 3-like 3                                           | 2.17                 |
| <i>Dhrs7</i>     | dehydrogenase/reductase (SDR family) member 7                | 2.16                 |
| <i>Gldc</i>      | glycine decarboxylase                                        | 2.10                 |
| <i>S100a5</i>    | S100 calcium binding protein A5                              | 2.08                 |
| <i>Ifitm6</i>    | interferon induced transmembrane protein 6                   | 2.06                 |
| <i>Clec4d</i>    | C-type lectin domain family 4, member d                      | 2.03                 |
| <i>Serpina3f</i> | serine (or cysteine) peptidase inhibitor, clade A, member 3F | 1.97                 |
| <i>Nrg4</i>      | neuregulin 4                                                 | 1.95                 |
| <i>Hdc</i>       | histidine decarboxylase                                      | 1.94                 |
| <i>Bank1</i>     | B-cell scaffold protein with ankyrin repeats 1               | 1.89                 |
| <i>Mt1</i>       | metallothionein 1                                            | 1.84                 |
| <i>Il6</i>       | interleukin 6                                                | 1.83                 |
| <i>Gem</i>       | GTP binding protein (gene overexpressed in skeletal muscle)  | 1.81                 |
| <i>Olfir56</i>   | olfactory receptor 56                                        | 1.80                 |
| <i>Ceacam1</i>   | CEA-related cell adhesion molecule 1                         | 1.80                 |
| <i>Fpr2</i>      | formyl peptide receptor 2                                    | 1.79                 |
| <i>Rad51ll</i>   | RAD51-like 1 ( <i>S. cerevisiae</i> )                        | 1.79                 |
| <i>Ly96</i>      | lymphocyte antigen 96                                        | 1.78                 |

|                  |                                                                                 |      |
|------------------|---------------------------------------------------------------------------------|------|
| <i>Gp1ba</i>     | glycoprotein 1b, alpha polypeptide                                              | 1.77 |
| <i>Clcn5</i>     | chloride channel 5                                                              | 1.77 |
| <i>Icam4</i>     | intercellular adhesion molecule 4, Landsteiner-Wiener blood group               | 1.76 |
| <i>Car1</i>      | carbonic anhydrase 1                                                            | 1.76 |
| <i>Camp</i>      | cathelicidin antimicrobial peptide                                              | 1.75 |
| <i>Fkbp11</i>    | FK506 binding protein 11                                                        | 1.74 |
| <i>Met</i>       | met proto-oncogene                                                              | 1.74 |
| <i>Rnd3</i>      | Rho family GTPase 3                                                             | 1.74 |
| <i>Klhl4</i>     | kelch-like 4 (Drosophila)                                                       | 1.73 |
| <i>Mt2</i>       | metallothionein 2                                                               | 1.72 |
| <i>Rabl3</i>     | RAB, member of RAS oncogene family-like 3                                       | 1.70 |
| <i>Ddah1</i>     | dimethylarginine dimethylaminohydrolase 1                                       | 1.70 |
| <i>Il1r2</i>     | interleukin 1 receptor, type II                                                 | 1.70 |
| <i>Fgl2</i>      | fibrinogen-like protein 2                                                       | 1.70 |
| <i>Nqo2</i>      | NAD(P)H dehydrogenase, quinone 2                                                | 1.69 |
| <i>Tirap</i>     | toll-interleukin 1 receptor (TIR) domain-containing adaptor protein             | 1.68 |
| <i>Gzmb</i>      | granzyme B                                                                      | 1.67 |
| <i>Tnfsf9</i>    | tumor necrosis factor (ligand) superfamily, member 9                            | 1.65 |
| <i>Osgepl1</i>   | O-sialoglycoprotein endopeptidase-like 1                                        | 1.65 |
| <i>Olfir1396</i> | olfactory receptor 1396                                                         | 1.64 |
| <i>Il4</i>       | interleukin 4                                                                   | 1.63 |
| <i>Stfa3</i>     | stefin A3                                                                       | 1.62 |
| <i>Zfp456</i>    | zinc finger protein 456                                                         | 1.62 |
| <i>Ccr1</i>      | chemokine (C-C motif) receptor 1                                                | 1.62 |
| <i>Vldlr</i>     | very low density lipoprotein receptor                                           | 1.62 |
| <i>Hopx</i>      | HOP homeobox                                                                    | 1.62 |
| <i>Slc40a1</i>   | solute carrier family 40 (iron-regulated transporter), member 1                 | 1.61 |
| <i>Retnla</i>    | resistin like alpha                                                             | 1.60 |
| <i>Irak1bp1</i>  | interleukin-1 receptor-associated kinase 1 binding protein 1                    | 1.59 |
| <i>Ero1l</i>     | ERO1-like (S. cerevisiae)                                                       | 1.59 |
| <i>Stx18</i>     | syntaxin 18                                                                     | 1.59 |
| <i>Elp4</i>      | elongation protein 4 homolog (S. cerevisiae)                                    | 1.59 |
| <i>Slc7a11</i>   | solute carrier family 7 (cationic amino acid transporter, y+ system), member 11 | 1.58 |
| <i>Mtmr9</i>     | myotubularin related protein 9                                                  | 1.57 |
| <i>Mrps18b</i>   | mitochondrial ribosomal protein S18B                                            | 1.56 |
| <i>Tmem34</i>    | transmembrane protein 34                                                        | 1.56 |

|                 |                                                               |      |
|-----------------|---------------------------------------------------------------|------|
| <i>Clybl</i>    | citrate lyase beta like                                       | 1.54 |
|                 | potassium voltage-gated channel, Isk-related subfamily, gene  |      |
| <i>Kcne3</i>    | 3                                                             | 1.54 |
| <i>Wdr32</i>    | WD repeat domain 32                                           | 1.54 |
| <i>Akap7</i>    | A kinase (PRKA) anchor protein 7                              | 1.51 |
| <i>Tnfrsf9</i>  | tumor necrosis factor receptor superfamily, member 9          | 1.51 |
| <i>Slc35f2</i>  | solute carrier family 35, member F2                           | 1.51 |
|                 | v-maf musculoaponeurotic fibrosarcoma oncogene family,        |      |
| <i>Maff</i>     | protein F (avian)                                             | 1.50 |
| <i>Gstm1</i>    | glutathione S-transferase, mu 1                               | 1.49 |
| <i>Trdmt1</i>   | tRNA aspartic acid methyltransferase 1                        | 1.48 |
| <i>Hsp90aa1</i> | heat shock protein 90, alpha (cytosolic), class A member 1    | 1.48 |
| <i>Rabl4</i>    | RAB, member of RAS oncogene family-like 4                     | 1.47 |
| <i>S100a8</i>   | S100 calcium binding protein A8 (calgranulin A)               | 1.47 |
| <i>Ston2</i>    | stonin 2                                                      | 1.47 |
| <i>Tspyl3</i>   | TSPY-like 3                                                   | 1.47 |
| <i>Lrrc42</i>   | leucine rich repeat containing 42                             | 1.46 |
|                 | DMC1 dosage suppressor of mck1 homolog, meiosis-specific      |      |
| <i>Dmc1</i>     | homologous recombination (yeast)disrupted meiotic cDNA 1      | 1.46 |
| <i>Abhd5</i>    | abhydrolase domain containing 5                               | 1.46 |
| <i>Clec4a2</i>  | C-type lectin domain family 4, member a2                      | 1.46 |
| <i>Tlr4</i>     | toll-like receptor 4                                          | 1.46 |
|                 | amyotrophic lateral sclerosis 2 (juvenile) chromosome region, |      |
| <i>Als2cr2</i>  | candidate 2 (human)                                           | 1.46 |
| <i>Abtb1</i>    | ankyrin repeat and BTB (POZ) domain containing 1              | 1.46 |
| <i>Sqrdl</i>    | sulfide quinone reductase-like (yeast)                        | 1.45 |
| <i>Snx16</i>    | sorting nexin 16                                              | 1.45 |
|                 | non-metastatic cells 6, protein expressed in (nucleoside-     |      |
| <i>Nme6</i>     | diphosphate kinase)                                           | 1.45 |
| <i>Stxbp6</i>   | syntaxin binding protein 6 (amisyn)                           | 1.44 |
| <i>C4a</i>      | complement component 4A (Rodgers blood group)                 | 1.44 |
| <i>Slc39a8</i>  | solute carrier family 39 (metal ion transporter), member 8    | 1.44 |
| <i>Ccr2</i>     | chemokine (C-C motif) receptor 2                              | 1.44 |
| <i>Arrdc4</i>   | arrestin domain containing 4                                  | 1.44 |
| <i>Fcgr2b</i>   | Fc receptor, IgG, low affinity IIb                            | 1.43 |
| <i>Mtrf1</i>    | mitochondrial translational release factor 1                  | 1.43 |
| <i>Tacstd1</i>  | tumor-associated calcium signal transducer 1                  | 1.42 |
| <i>Ppfbp1</i>   | PTPRF interacting protein, binding protein 1 (liprin beta 1)  | 1.42 |
| <i>Zfp280b</i>  | zinc finger protein 280b                                      | 1.42 |
| <i>Alox5</i>    | arachidonate 5-lipoxygenase                                   | 1.42 |

|                 |                                                                                                                              |      |
|-----------------|------------------------------------------------------------------------------------------------------------------------------|------|
| <i>Schip1</i>   | schwannomin interacting protein 1                                                                                            | 1.42 |
| <i>Klf1</i>     | Kruppel-like factor 1 (erythroid)                                                                                            | 1.41 |
| <i>Rnf17</i>    | ring finger protein 17                                                                                                       | 1.41 |
| <i>Car9</i>     | carbonic anhydrase 9                                                                                                         | 1.41 |
| <i>Esm1</i>     | endothelial cell-specific molecule 1                                                                                         | 1.41 |
| <i>Napsa</i>    | napsin A aspartic peptidase                                                                                                  | 1.40 |
| <i>Vmn2r51</i>  | vomeronasal 2, receptor 51                                                                                                   | 1.40 |
| <i>Spry2</i>    | sprouty homolog 2 (Drosophila)                                                                                               | 1.40 |
| <i>Tmem119</i>  | transmembrane protein 119                                                                                                    | 1.40 |
| <i>Igfbp7</i>   | insulin-like growth factor binding protein 7                                                                                 | 1.39 |
| <i>Mospd1</i>   | motile sperm domain containing 1                                                                                             | 1.39 |
| <i>Ctsl</i>     | cathepsin L                                                                                                                  | 1.39 |
| <i>Hacl1</i>    | 2-hydroxyacyl-CoA lyase 1                                                                                                    | 1.39 |
| <i>Lat2</i>     | linker for activation of T cells family, member 2                                                                            | 1.39 |
| <i>Hbegf</i>    | heparin-binding EGF-like growth factor                                                                                       | 1.39 |
| <i>Angptl3</i>  | angiopoietin-like 3                                                                                                          | 1.39 |
| <i>Rhbdl2</i>   | rhomboid, veinlet-like 2 (Drosophila)                                                                                        | 1.39 |
| <i>Pih1d2</i>   | PIH1 domain containing 2                                                                                                     | 1.39 |
| <i>Cd300a</i>   | CD300A antigen                                                                                                               | 1.38 |
| <i>Tmem41a</i>  | transmembrane protein 41a                                                                                                    | 1.38 |
| <i>Ceacam10</i> | CEA-related cell adhesion molecule 10                                                                                        | 1.38 |
| <i>Zfp296</i>   | zinc finger protein 296                                                                                                      | 1.37 |
| <i>Tmem67</i>   | transmembrane protein 67                                                                                                     | 1.37 |
| <i>Ralb</i>     | v-ral simian leukemia viral oncogene homolog B (ras related)<br>solute carrier family 16 (monocarboxylic acid transporters), | 1.37 |
| <i>Slc16a1</i>  | member 1                                                                                                                     | 1.36 |
| <i>Iscu</i>     | IscU iron-sulfur cluster scaffold homolog (E. coli)                                                                          | 1.36 |
| <i>Perp</i>     | PERP, TP53 apoptosis effector                                                                                                | 1.36 |
| <i>Pla2g12a</i> | phospholipase A2, group XIIA                                                                                                 | 1.36 |
| <i>Prmt6</i>    | protein arginine N-methyltransferase 6                                                                                       | 1.36 |
| <i>Acot1</i>    | acyl-CoA thioesterase 1                                                                                                      | 1.35 |
| <i>Dhx35</i>    | DEAH (Asp-Glu-Ala-His) box polypeptide 35                                                                                    | 1.35 |
| <i>Ears2</i>    | glutamyl-tRNA synthetase 2 (mitochondrial)(putative)                                                                         | 1.35 |
| <i>Slc35b1</i>  | solute carrier family 35, member B1<br>macrophage galactose N-acetyl-galactosamine specific lectin                           | 1.35 |
| <i>Mgl1</i>     | 1                                                                                                                            | 1.34 |
| <i>Slc24a5</i>  | solute carrier family 24, member 5                                                                                           | 1.34 |
| <i>Vrk2</i>     | vaccinia related kinase 2                                                                                                    | 1.33 |
| <i>St7</i>      | Suppression of tumorigenicity 7                                                                                              | 1.33 |
| <i>Fbxo18</i>   | F-box protein 18                                                                                                             | 1.33 |

|                |                                                                                               |      |
|----------------|-----------------------------------------------------------------------------------------------|------|
| <i>Ofd1</i>    | oral-facial-digital syndrome 1 gene homolog (human)                                           | 1.33 |
| <i>Metrn1</i>  | meteorin, glial cell differentiation regulator-like                                           | 1.33 |
| <i>Rps6kc1</i> | ribosomal protein S6 kinase polypeptide 1                                                     | 1.33 |
| <i>Hif1a</i>   | hypoxia inducible factor 1, alpha subunit                                                     | 1.33 |
| <i>Tnfsf4</i>  | tumor necrosis factor (ligand) superfamily, member 4                                          | 1.32 |
| <i>Vnn1</i>    | vanin 1                                                                                       | 1.32 |
| <i>Hs6st2</i>  | heparan sulfate 6-O-sulfotransferase 2                                                        | 1.32 |
| <i>Cebpb</i>   | CCAAT/enhancer binding protein (C/EBP), beta                                                  | 1.32 |
| <i>Cftr</i>    | cystic fibrosis transmembrane conductance regulator homolog                                   | 1.32 |
| <i>Nmt1</i>    | N-myristoyltransferase 1                                                                      | 1.31 |
| <i>Smok3c</i>  | sperm motility kinase 3C                                                                      | 1.31 |
| <i>Pus3</i>    | pseudouridine synthase 3                                                                      | 1.31 |
| <i>Grina</i>   | glutamate receptor, ionotropic, N-methyl D-aspartate-associated protein 1 (glutamate binding) | 1.31 |
| <i>Fads1</i>   | fatty acid desaturase 1                                                                       | 1.31 |
| <i>Slco4c1</i> | solute carrier organic anion transporter family, member 4C1                                   | 1.31 |
| <i>Taf1b</i>   | TATA box binding protein (Tbp)-associated factor, RNA polymerase I, B                         | 1.31 |
| <i>Fibp</i>    | fibroblast growth factor (acidic) intracellular binding protein                               | 1.31 |
| <i>Evi2a</i>   | ecotropic viral integration site 2a                                                           | 1.31 |
| <i>Scn1b</i>   | sodium channel, voltage-gated, type I, beta                                                   | 1.30 |
| <i>Glb1</i>    | galactosidase, beta 1                                                                         | 1.30 |

---

**Supplementary Table 3. Sequences of real time PCR primers.**

---

1. *Pax5* sense: GTACAGCAGCCCCCAATC  
antisense: ACCTTCATCCCTCTTGCGTTT
  2. *Blk* sense: TGTGGTCACCAGAGAGCCCATTTA  
antisense: TGTCAATCAGCCTTGGAAGGGACA
  3. *EBF1* sense: TGCAGATCTGGTTGAAGCCCTGTA  
antisense: ATCCCTGCATGGACCGAAGTGTTA
  4. *Skp2* sense: AAACCTTTGTGGGTGCTCTG  
antisense: CTTAAGTCGAGGCGGATGAG
  5. *BCR* sense: CGTGTGTGAAACTCCAGACTGTCA  
*ABL* antisense: CTTCAGCGGCCAGTAGCATCT
  6. *Actin* sense: ATGGAATCCTGTGGCATCCA  
antisense: CGCTCAGGAGGAGCAATGAT
  7. Myc-chip sense: GACGTGTCTGGGGACATCTTG  
antisense: GTCCGAAGGCACCGTGAAATG
  8. EBF1-chip sense: ACTACGGAGACTACTTGGTGG  
antisense: CACCGGACATCGCAAATTCAC
-

## Supplementary Note

In discussion, although a ten-fold overexpression of *Pax5* inhibited normal HSCs in some degree, we believe that restoration of *Pax5* expression to a normal endogenous level in HSCs would not significantly inhibit proliferation. In contrast to the effect of *Pax5* on HSCs, *Pax5* overexpression strongly inhibited proliferation of LSCs and CML development. On the other hand, our observation that a higher percentage of B cells were found following *Pax5* overexpression at 8 and 12 weeks after BMT suggests that *Pax5* promotes progenitor differentiation into B cells, which is consistent with the known role of *Pax5* in initiating B-cell commitment. Moreover, the increase of myeloid cells at 16 weeks implies that *Pax5* overexpression could regulate cell fate determination of HSCs. Thus, further investigation is required to elucidate the complete role of *Pax5* in HSCs.
